# Supplementary material for: Comparing Fungal Sensitivity to Glucosinolate-Breakdown Products on Different <em>Botrytis</em> spp.
Source: Preprints.org preprint supplement (doi:10.20944/preprints202401.2028.v1), 2024-01-30
Supplement: Supplementary file 1 [file supplementary]

**Supplementary Table 1.** List of oligonucleotides used for the expression analysis study.

| **Name of the Oligo** | **Sequence** | **Description of the primer** |
| --- | --- | --- |
| FwMfsGcinerea | GTATACTGGAGCACAAGCTT | mRNA level quantification of the gene *mfsG* in *B. cinerea* |
| RvMfsGcinerea | GGTGAATTTCTCGTCTTCTAG | mRNA level quantification of the gene *mfsG* in *B. cinerea* |
| FwMfsGpseudocinerea | ATACTGGAGCACAAGCTTT | mRNA level quantification of the gene *mfsG* in *B. pseudocinerea* |
| RvMfsGpseudocinerea | CTGAATTTCTCGTCTTCTAGC | mRNA level quantification of the gene *mfsG* in *B. pseudocinerea* |
| FwMfsGbyssoidea | TTAGTCTTGGGAGGCTCAAT | mRNA level quantification of the gene *mfsG* in *B. byssoidea* |
| RvMfsGbyssoidea | TTATATCCTCGCCCAGATG | mRNA level quantification of the gene *mfsG* in *B. byssoidea* |
| FwActAcinerea | TTTGAGACCTTCAACGCCCC | mRNA level quantification of the gene *BcactA* in *B. cinerea* |
| RvActAcinerea | ACGTGAGTAACTCCGTCACC | mRNA level quantification of the gene *BcactA* in *B. cinerea* |
| FwActApseudocinerea | GGTGGTATCCACGTCACTA | mRNA level quantification of the gene *Bctub* in *B. pseudocinerea* |
| RvActApseudocinerea | CATAACAATGTTACCATACAAATC | mRNA level quantification of the gene *Bctub* in *B. pseudocinerea* |
| FwActAbyssoidea | TGACGATGCTCCAAGAGC | mRNA level quantification of the gene *Bctub* in *B. byssoidea* |
| RvActAbyssoidea | ATTGTCAATGACGAGGGCT | mRNA level quantification of the gene *Bctub* in *B. byssoidea* |
| Fwtubcinerea | TCCTTTCGGTCAACTCTTCCG | mRNA level quantification of the gene β-tubuline in *B. cinerea* |
| Rvtubcinerea | CACCCTCAGTGTTAATGACCC | mRNA level quantification of the gene β-tubuline in *B. cinerea* |
| Fwtubpseudocinerea | GATCTCCAACTTGAGCGTA | mRNA level quantification of the gene β-tubuline in *B. pseudocinerea* |
| Rvtubpseudocinerea | TGCTCGCCAGAGATAGTTT | mRNA level quantification of the gene β-tubuline in *B. pseudocinerea* |
| Fwtubbyssoidea | GGTGATCAATTCACTGCTAT | mRNA level quantification of the gene β-tubuline in *B. byssoidea* |
| Rvtubbyssoidea | TTCATGTTGGACTCAGCCT | mRNA level quantification of the gene β-tubuline in *B. byssoidea* |

**Supplementary Table 2.** Statistics of the effect of PITCH, BITCH and PhITC on growth inhibition in *B. cinerea*, *B. pseudocinerea*, *B. byssoidea*, *B. deweyae*, *B. fabae* and *B. convoluta* (part 1).

| *Botrytis cinerea* | | | | | | | | | | | | | | | | |
| --- | --- | --- | --- | --- | --- | --- | --- | --- | --- | --- | --- | --- | --- | --- | --- | --- |
| Descriptive Statistics | *PITC* | | | | | *BITC* | | | | | | *PhITC* | | | | |
| 0μM | 20μM | 50μM | 100μM | 200μM | 0μM | 20μM | 50μM | 100μM | 200μM | 0μM | | 20μM | 50μM | 100μM | 200μM |
| Average | 10.21 | 9.26 | 13.085 | 15.8625 | 17.3475 | 8.56 | 17.8125 | 22.35 | 28.71 | 34.7225 | 10.21 | | 10.0525 | 20.5225 | 24.7925 | 29.465 |
| Standard Error | 0.974572885 | 0.46668223 | 0.4994298 | 0.32511709 | 0.60147242 | 0.80211899 | 0.6203823 | 0.77614266 | 0.69571767 | 0.44359382 | 0.97457288 | | 0.93252475 | 0.877711823 | 0.39305489 | 0.37654894 |
| Median | 10 | 8.8 | 13.5 | 16.1 | 16.25 | 8.7 | 18.05 | 21.9 | 29.1 | 34.45 | 10 | | 10.25 | 20.8 | 24.95 | 29.05 |
| Mode | 4.9 | 13.4 | 17.3 | 14.6 | 13.2 | 15.6 | 18.4 | 15 | 31.6 | 36.5 | 4.9 | | #N/D | 20.8 | 25.4 | 30.8 |
| Standard deviation | 6.163740123 | 2.95155761 | 3.15867142 | 2.05622102 | 3.80404559 | 5.07304592 | 3.92364218 | 4.90875722 | 4.40010489 | 2.80553368 | 6.16374012 | | 5.89780435 | 5.551136982 | 2.4858974 | 2.38150459 |
| Variance of the sample | 37.99169231 | 8.71169231 | 9.97720513 | 4.22804487 | 14.4707628 | 25.7357949 | 15.3949679 | 24.0958974 | 19.3609231 | 7.87101923 | 37.9916923 | | 34.7840962 | 30.81512179 | 6.1796859 | 5.6715641 |
| Kurtosis | -1.391039744 | -1.1443825 | -1.4228365 | -0.9105192 | -0.8781475 | -0.3923732 | -1.3004265 | -1.387347 | -0.8328197 | -0.8615327 | -1.3910397 | | -1.2505027 | -0.870214414 | -0.5216969 | -0.1192733 |
| Asymmetry coefficient | 0.143795644 | 0.33464225 | -0.0812506 | -0.0126926 | 0.55699885 | 0.1594065 | 0.06437936 | 0.05142907 | -0.4799663 | 0.14472115 | 0.14379564 | | 0.01001446 | -0.246082926 | 0.11615217 | 0.69294298 |
| Range | 18.9 | 9.8 | 9.7 | 7.6 | 12.7 | 19.7 | 12.7 | 14.5 | 14.8 | 9.8 | 18.9 | | 18.7 | 19.7 | 9.5 | 8.7 |
| Minimum | 0.8 | 5.1 | 8 | 12.3 | 12.3 | 0.1 | 12.1 | 15 | 20.1 | 30.1 | 0.8 | | 0.6 | 10.1 | 20.4 | 26.1 |
| Maximum | 19.7 | 14.9 | 17.7 | 19.9 | 25 | 19.8 | 24.8 | 29.5 | 34.9 | 39.9 | 19.7 | | 19.3 | 29.8 | 29.9 | 34.8 |
| Sum | 408.4 | 370.4 | 523.4 | 634.5 | 693.9 | 342.4 | 712.5 | 894 | 1148.4 | 1388.9 | 408.4 | | 402.1 | 820.9 | 991.7 | 1178.6 |
| Account | 40 | 40 | 40 | 40 | 40 | 40 | 40 | 40 | 40 | 40 | 40 | | 40 | 40 | 40 | 40 |
| Confidence level (95.0%) | 1.971259725 | 0.94395392 | 1.01019213 | 0.65761138 | 1.2165928 | 1.62243879 | 1.25484165 | 1.56989672 | 1.40722181 | 0.8972532 | 1.97125972 | | 1.88620934 | 1.775339736 | 0.79502856 | 0.76164212 |
| *Botrytis pseudocinerea* | | | | | | | | | | | | | | | | |
| Descriptive Statistics | *PITC* | | | | | *BITC* | | | | | | *PhITC* | | | | |
| 0μM | 20μM | 50μM | 100μM | 200μM | 0μM | 20μM | 50μM | 100μM | 200μM | 0μM | | 20μM | 50μM | 100μM | 200μM |
| Average | 2.7075 | 2.7075 | 2.7075 | 4.73 | 4.5575 | 2.6775 | 2.6975 | 7.1625 | 10.4525 | 11.87 | 2.6425 | | 2.73 | 2.5875 | 7.4525 | 7.7825 |
| Standard Error | 0.219888885 | 0.21988889 | 0.21988889 | 0.21228911 | 0.47577046 | 0.22669553 | 0.21535562 | 0.2183178 | 0.42742502 | 0.69210937 | 0.21530799 | | 0.19349021 | 0.224926982 | 0.20047979 | 0.67551393 |
| Median | 2.8 | 2.8 | 2.8 | 4.7 | 4.65 | 2.85 | 2.65 | 7.1 | 10.05 | 12.15 | 2.85 | | 2.75 | 2.6 | 7.5 | 7.95 |
| Mode | 3.8 | 3.8 | 3.8 | 4.7 | 0.2 | 3.1 | 2.5 | 5.1 | 9.5 | 6.4 | 3.9 | | 3.6 | 4.2 | 7 | 7.5 |
| Standard deviation | 1.390699418 | 1.39069942 | 1.39069942 | 1.34263423 | 3.0090366 | 1.43374845 | 1.36202856 | 1.38076298 | 2.70327318 | 4.37728402 | 1.36172732 | | 1.22373954 | 1.422563144 | 1.26794554 | 4.27232522 |
| Variance of the sample | 1.934044872 | 1.93404487 | 1.93404487 | 1.80266667 | 9.05430128 | 2.05563462 | 1.85512179 | 1.90650641 | 7.3076859 | 19.1606154 | 1.85430128 | | 1.49753846 | 2.023685897 | 1.6076859 | 18.2527628 |
| Kurtosis | -0.948003683 | -0.9480037 | -0.9480037 | -0.7528574 | -1.3992196 | -1.1233011 | -1.0981824 | -1.2947588 | -1.1204196 | -1.2818936 | -1.0993221 | | -1.2786253 | -1.221652606 | -0.6643035 | -1.0270216 |
| Asymmetry coefficient | -0.274816505 | -0.2748165 | -0.2748165 | -0.2244651 | 0.02509229 | -0.0680527 | -0.0562555 | 0.05284342 | -0.009548 | 0.17535054 | -0.144074 | | -0.0160159 | -0.034345306 | 0.03588223 | -0.0425686 |
| Range | 5 | 5 | 5 | 4.9 | 9.1 | 4.7 | 4.8 | 4.7 | 9.2 | 14.7 | 4.6 | | 4.2 | 4.6 | 4.7 | 14.7 |
| Minimum | 0 | 0 | 0 | 2.1 | 0.2 | 0.3 | 0.1 | 5.1 | 5.8 | 5.1 | 0.3 | | 0.7 | 0.2 | 5.1 | 0.2 |
| Maximum | 5 | 5 | 5 | 7 | 9.3 | 5 | 4.9 | 9.8 | 15 | 19.8 | 4.9 | | 4.9 | 4.8 | 9.8 | 14.9 |
| Sum | 108.3 | 108.3 | 108.3 | 189.2 | 182.3 | 107.1 | 107.9 | 286.5 | 418.1 | 474.8 | 105.7 | | 109.2 | 103.5 | 298.1 | 311.3 |
| Account | 40 | 40 | 40 | 40 | 40 | 40 | 40 | 40 | 40 | 40 | 40 | | 40 | 40 | 40 | 40 |
| Confidence level (95.0%) | 0.444767251 | 0.44476725 | 0.44476725 | 0.42939526 | 0.96233659 | 0.458535 | 0.43559787 | 0.44158942 | 0.86454871 | 1.39992335 | 0.43550152 | | 0.39137089 | 0.454957765 | 0.40550866 | 1.36635589 |

| *Botrytis byssoidea* | | | | | | | | | | | | | | | | |
| --- | --- | --- | --- | --- | --- | --- | --- | --- | --- | --- | --- | --- | --- | --- | --- | --- |
| Descriptive Statistics | *PITC* | | | | | *BITC* | | | | | | *PhITC* | | | | |
| 0μM | 20μM | 50μM | 100μM | 200μM | 0μM | 20μM | 50μM | 100μM | 200μM | 0μM | | 20μM | 50μM | 100μM | 200μM |
| Average | 9.55 | 10.265 | 12.19 | 14.4375 | 17.54 | 9.55 | 20.145 | 32.0375 | 50.945 | 58.555 | 9.55 | | 16.195 | 20.2775 | 32.945 | 40.0875 |
| Standard Error | 0.361584831 | 0.46309369 | 0.42011598 | 0.4818193 | 0.38955596 | 0.36158483 | 0.45258446 | 0.68588038 | 0.90198464 | 1.11188769 | 0.36158483 | | 0.37079177 | 0.433241916 | 0.66777424 | 0.98167301 |
| Median | 9.75 | 10.8 | 11.55 | 14.15 | 17.25 | 9.75 | 20.45 | 31.1 | 50.8 | 58.7 | 9.75 | | 16.05 | 20.65 | 33.2 | 39.5 |
| Mode | 11.5 | 13.5 | 11.5 | 18.1 | 20.8 | 11.5 | 22.6 | 30.9 | 58.1 | 67.8 | 11.5 | | 12.6 | 22.4 | 30.5 | 49.6 |
| Standard deviation | 2.286863264 | 2.92886168 | 2.65704675 | 3.04729283 | 2.46376822 | 2.28686326 | 2.86239545 | 4.33788839 | 5.70465172 | 7.03219519 | 2.28686326 | | 2.34509308 | 2.740062464 | 4.22337512 | 6.20864523 |
| Variance of the sample | 5.22974359 | 8.57823077 | 7.05989744 | 9.28599359 | 6.07015385 | 5.22974359 | 8.19330769 | 18.8172756 | 32.5430513 | 49.4517692 | 5.22974359 | | 5.49946154 | 7.507942308 | 17.8368974 | 38.5472756 |
| Kurtosis | -0.658140565 | -1.1575337 | -0.8675691 | -1.3270165 | -1.0846908 | -0.6581406 | -1.1573047 | -1.2441011 | -1.1293854 | -1.3342956 | -0.6581406 | | -1.1379023 | -0.955903909 | -1.123884 | -1.3297633 |
| Asymmetry coefficient | -0.561108012 | -0.1766455 | 0.24359098 | 0.24109538 | 0.23453751 | -0.561108 | -0.0612574 | 0.31055365 | -0.1504683 | -0.028555 | -0.561108 | | -0.0660008 | -0.235924447 | -0.0832902 | 0.00943409 |
| Range | 7.9 | 9.8 | 9.4 | 9.9 | 8.7 | 7.9 | 9.6 | 14.6 | 19.3 | 22.3 | 7.9 | | 7.8 | 9.9 | 14.3 | 19.2 |
| Minimum | 5 | 5.1 | 7.6 | 10.1 | 13.2 | 5 | 15.3 | 25.4 | 40.5 | 47 | 5 | | 12.2 | 15.1 | 25.2 | 30.4 |
| Maximum | 12.9 | 14.9 | 17 | 20 | 21.9 | 12.9 | 24.9 | 40 | 59.8 | 69.3 | 12.9 | | 20 | 25 | 39.5 | 49.6 |
| Sum | 382 | 410.6 | 487.6 | 577.5 | 701.6 | 382 | 805.8 | 1281.5 | 2037.8 | 2342.2 | 382 | | 647.8 | 811.1 | 1317.8 | 1603.5 |
| Account | 40 | 40 | 40 | 40 | 40 | 40 | 40 | 40 | 40 | 40 | 40 | | 40 | 40 | 40 | 40 |
| Confidence level (95.0%) | 0.731374354 | 0.93669541 | 0.84976478 | 0.97457153 | 0.7879513 | 0.73137435 | 0.91543848 | 1.38732401 | 1.82443613 | 2.24900513 | 0.73137435 | | 0.74999715 | 0.876314489 | 1.35070089 | 1.98562108 |
| *Botrytis deweyae* | | | | | | | | | | | | | | | | |
| Descriptive Statistics | *PITC* | | | | | *BITC* | | | | | | *PhITC* | | | | |
| 0μM | 20μM | 50μM | 100μM | 200μM | 0μM | 20μM | 50μM | 100μM | 200μM | 0μM | | 20μM | 50μM | 100μM | 200μM |
| Average | 2.1325 | 34.0325 | 45.3025 | 69.36 | 74.6525 | 2.12 | 79.2325 | 100 | 100 | 100 | 2.425 | | 59.995 | 71.055 | 95.16 | 100 |
| Standard Error | 0.24322585 | 0.47874552 | 0.49051892 | 1.2314615 | 0.47610852 | 0.21927035 | 0.80776986 | 0 | 0 | 0 | 0.21209426 | | 0.81260857 | 0.893315274 | 0.46593991 | 0 |
| Median | 1.8 | 33.15 | 45.55 | 70.7 | 74.45 | 2.1 | 79.1 | 100 | 100 | 100 | 2.3 | | 60.5 | 72.4 | 95.15 | 100 |
| Mode | 4.2 | 30.2 | 41.2 | 72.7 | 76 | 0.7 | 81.7 | 100 | 100 | 100 | 3.5 | | 55.4 | 61.7 | 95.1 | 100 |
| Standard deviation | 1.538295344 | 3.02785254 | 3.10231407 | 7.78844641 | 3.0111747 | 1.38678747 | 5.10878517 | 0 | 0 | 0 | 1.34140187 | | 5.13938787 | 5.649821871 | 2.94686274 | 0 |
| Variance of the sample | 2.366352564 | 9.16789103 | 9.62435256 | 60.6598974 | 9.06717308 | 1.92317949 | 26.0996859 | 0 | 0 | 0 | 1.79935897 | | 26.4133077 | 31.92048718 | 8.684 | 0 |
| Kurtosis | -1.257695296 | -1.2916672 | -1.3162588 | 0.84270559 | -1.1764021 | -0.9227221 | -0.472087 | - | - | - | -1.2505082 | | -0.8611531 | -0.988594942 | -1.045463 | - |
| Asymmetry coefficient | 0.346351512 | 0.36660678 | -0.157508 | -0.9919596 | 0.0511048 | 0.27331627 | 0.23789255 | - | - | - | 0.04242883 | | -0.1362191 | -0.4577524 | 0.04007855 | - |
| Range | 5 | 9.7 | 9.6 | 31.7 | 9.6 | 4.8 | 18.6 | 0 | 0 | 0 | 4.3 | | 19 | 19.2 | 9.6 | 0 |
| Minimum | 0 | 30.1 | 40.1 | 48.1 | 70 | 0.1 | 71.1 | 100 | 100 | 100 | 0.3 | | 50.3 | 60.1 | 90.4 | 100 |
| Maximum | 5 | 39.8 | 49.7 | 79.8 | 79.6 | 4.9 | 89.7 | 100 | 100 | 100 | 4.6 | | 69.3 | 79.3 | 100 | 100 |
| Sum | 85.3 | 1361.3 | 1812.1 | 2774.4 | 2986.1 | 84.8 | 3169.3 | 4000 | 4000 | 4000 | 97 | | 2399.8 | 2842.2 | 3806.4 | 4000 |
| Account | 40 | 40 | 40 | 40 | 40 | 40 | 40 | 40 | 40 | 40 | 40 | | 40 | 40 | 40 | 40 |
| Confidence level (95.0%) | 0.491970718 | 0.96835422 | 0.99216817 | 2.490866 | 0.96302039 | 0.44351615 | 1.63386876 | 0 | 0 | 0 | 0.42900113 | | 1.64365598 | 1.806900694 | 0.94245243 | 0 |

**Supplementary Table 2.** Statistics of the effect of PITCH, BITCH and PhITC on growth inhibition in *B. cinerea*, *B. pseudocinerea*, *B. byssoidea*, *B. deweyae*, *B. fabae* and *B. convoluta* (part 2).

**Supplementary Table 2.** Statistics of the effect of PITCH, BITCH and PhITC on growth inhibition in *B. cinerea*, *B. pseudocinerea*, *B. byssoidea*, *B. deweyae*, *B. fabae* and *B. convoluta* (part 3).

| *Botrytis fabae* | | | | | | | | | | | | | | | |
| --- | --- | --- | --- | --- | --- | --- | --- | --- | --- | --- | --- | --- | --- | --- | --- |
| Descriptive Statistics | *PITC* | | | | | *BITC* | | | | | *PhITC* | | | | |
| 0μM | 20μM | 50μM | 100μM | 200μM | 0μM | 20μM | 50μM | 100μM | 200μM | 0μM | 20μM | 50μM | 100μM | 200μM |
| Average | 9.34 | 87.035 | 93.0975 | 94.7125 | 100 | 10.4525 | 95.2525 | 100 | 100 | 100 | 10.0075 | 93.0975 | 94.1875 | 100 | 100 |
| Standard Error | 0.80143941 | 0.66972583 | 0.69607404 | 0.43443431 | 0 | 0.87563887 | 0.4414572 | 0 | 0 | 0 | 0.91810415 | 0.69607404 | 0.455679086 | 0 | 0 |
| Median | 9.75 | 86.85 | 93.25 | 94.7 | 100 | 10.6 | 95.2 | 100 | 100 | 100 | 10.3 | 93.25 | 94.1 | 100 | 100 |
| Mode | 11.6 | 87.3 | 92.3 | 95 | 100 | 8.6 | 94.6 | 100 | 100 | 100 | 10 | 92.3 | 90.9 | 100 | 100 |
| Standard deviation | 5.068747886 | 4.23571808 | 4.40235878 | 2.74760385 | 0 | 5.53802647 | 2.79202045 | 0 | 0 | 0 | 5.80660047 | 4.40235878 | 2.881967588 | 0 | 0 |
| Variance of the sample | 25.69220513 | 17.9413077 | 19.3807628 | 7.54932692 | 0 | 30.6697372 | 7.79537821 | 0 | 0 | 0 | 33.716609 | 19.3807628 | 8.305737179 | 0 | 0 |
| Kurtosis | -0.778245007 | -0.8490483 | -1.022618 | -0.8749271 | - | -1.0183814 | -0.9268091 | - | - | - | -1.1164188 | -1.022618 | -0.993198632 | - | - |
| Asymmetry coefficient | -0.095701463 | 0.25305131 | -0.2533727 | 0.20011407 | - | -0.0203129 | 0.03765694 | - | - | - | -0.1130984 | -0.2533727 | 0.264032645 | - | - |
| Range | 18.7 | 14.4 | 14.8 | 9.7 | 0 | 19.6 | 9.7 | 0 | 0 | 0 | 19.4 | 14.8 | 9.8 | 0 | 0 |
| Minimum | 0.3 | 80.4 | 85.1 | 90.2 | 100 | 0.2 | 90.2 | 100 | 100 | 100 | 0.4 | 85.1 | 90.1 | 100 | 100 |
| Maximum | 19 | 94.8 | 99.9 | 99.9 | 100 | 19.8 | 99.9 | 100 | 100 | 100 | 19.8 | 99.9 | 99.9 | 100 | 100 |
| Sum | 373.6 | 3481.4 | 3723.9 | 3788.5 | 4000 | 418.1 | 3810.1 | 4000 | 4000 | 4000 | 400.3 | 3723.9 | 3767.5 | 4000 | 4000 |
| Account | 40 | 40 | 40 | 40 | 40 | 40 | 40 | 40 | 40 | 40 | 40 | 40 | 40 | 40 | 40 |
| Confidence level (95.0%) | 1.621064218 | 1.35464836 | 1.40794264 | 0.87872634 | 0 | 1.77114679 | 0.89293146 | 0 | 0 | 0 | 1.85704092 | 1.40794264 | 0.92169795 | 0 | 0 |
| *Botrytis convoluta* | | | | | | | | | | | | | | | |
| Descriptive Statistics | *PITC* | | | | | *BITC* | | | | | *PhITC* | | | | |
| 0μM | 20μM | 50μM | 100μM | 200μM | 0μM | 20μM | 50μM | 100μM | 200μM | 0μM | 20μM | 50μM | 100μM | 200μM |
| Average | 15.915 | 66.9325 | 71.61 | 81.3375 | 100 | 14.9 | 88.06 | 100 | 100 | 100 | 14.0925 | 82.305 | 100 | 100 | 100 |
| Standard Error | 1.392201494 | 0.78772138 | 0.74287039 | 0.63276649 | 0 | 1.33420484 | 0.57519005 | 0 | 0 | 0 | 1.18202557 | 0.72424983 | 0 | 0 | 0 |
| Median | 15.8 | 65.95 | 70.35 | 80.75 | 100 | 17.15 | 88 | 100 | 100 | 100 | 13.35 | 81.8 | 100 | 100 | 100 |
| Mode | 15.2 | 60 | 73.4 | 77.8 | 100 | 18.6 | 88 | 100 | 100 | 100 | 22.2 | 80.5 | 100 | 100 | 100 |
| Standard deviation | 8.805055366 | 4.98198743 | 4.69832485 | 4.00196666 | 0 | 8.43825234 | 3.63782127 | 0 | 0 | 0 | 7.47578613 | 4.58055813 | 0 | 0 | 0 |
| Variance of the sample | 77.529 | 24.8201987 | 22.0742564 | 16.0157372 | 0 | 71.2041026 | 13.2337436 | 0 | 0 | 0 | 55.8873782 | 20.9815128 | 0 | 0 | 0 |
| Kurtosis | -0.931762334 | -1.385179 | -1.1410755 | -0.7780489 | - | -1.24775 | -0.7084288 | - | - | - | -0.5632097 | -1.1718688 | - | - | - |
| Asymmetry coefficient | -0.129321827 | 0.31497356 | 0.47551972 | 0.37309729 | - | -0.1961462 | -0.133071 | - | - | - | 0.32314625 | 0.04136184 | - | - | - |
| Range | 29.5 | 14.9 | 14.6 | 14 | 0 | 28.3 | 14.2 | 0 | 0 | 0 | 27.9 | 14.7 | 0 | 0 | 0 |
| Minimum | 0.4 | 60 | 65.2 | 75 | 100 | 1.1 | 80.5 | 100 | 100 | 100 | 1.4 | 75.2 | 100 | 100 | 100 |
| Maximum | 29.9 | 74.9 | 79.8 | 89 | 100 | 29.4 | 94.7 | 100 | 100 | 100 | 29.3 | 89.9 | 100 | 100 | 100 |
| Sum | 636.6 | 2677.3 | 2864.4 | 3253.5 | 4000 | 596 | 3522.4 | 4000 | 4000 | 4000 | 563.7 | 3292.2 | 4000 | 4000 | 4000 |
| Account | 40 | 40 | 40 | 40 | 40 | 40 | 40 | 40 | 40 | 40 | 40 | 40 | 40 | 40 | 40 |
| Confidence level (95.0%) | 2.815993321 | 1.59331688 | 1.50259718 | 1.27989103 | 0 | 2.69868402 | 1.16343168 | 0 | 0 | 0 | 2.39087239 | 1.46493356 | 0 | 0 | 0 |
